# Supplementary material
Source: publisher figshare collection journal article supplement (https://tandf.figshare.com/ndownloader/files/15603245)
Supplement: Supplementary file 1 [file 15603245]

**Supplementary Information: Exploring links between national climate strategies and non-state and subnational climate action in Nationally Determined Contributions (NDCs)**

Angel Hsu1,2, John Brandt2, Oscar Widerberg3, Sander Chan4, and Amy Weinfurter2

1Yale-NUS College,2 Yale School of Forestry and Environmental Studies,3 Institute for Environmental Studies at Vrije Universiteit Amsterdam,2 German Development Institute/Deutsches Institut für Entwicklungspolitik (DIE) 4

**Table S1.** Stopwords and other words removed to compile the NDC corpus.

| "arabian", "european", "australian", "indian", "national", "eu", "'s", "climate", "change", "will", "'s", "use", "republic", "management", "adaptation", "sector", "low-carbon", "good", "composed", "submit", "stoves", "point", "relative", "determined", "communicates", "clarity", "appropriate", "blue", "narrow", "show", "shall", "sub-", "uses", "seven", "south-south", "agreed", "turn", "unique", "continuously", "excluding", "feed-", "development", "capacity", "borne", "including", "certain", "nationally", "whole" |
| --- |

**Table S2**. Regional and UNFCCC designations for countries in the analysis.

| **Country** | **UNFCCC designation** | **Region** | **Excluded from final analysis due to no mention of NSA** |
| --- | --- | --- | --- |
| Afghanistan | Non-Annex I (Developing country), LDC | Asia |  |
| Albania | Non-Annex I (Developing country) | Europe | Excluded from final analysis |
| Algeria | Non-Annex I (Developing country) | Africa |  |
| Andorra | Non-Annex I (Developing country) | Europe | Excluded from final analysis |
| Angola | Non-Annex I (Developing country), LDC | Africa |  |
| Antigua and Barbuda | Non-Annex I (Developing country) | North America | Excluded from final analysis |
| Argentina | Non-Annex I (Developing country) | South America |  |
| Armenia | Non-Annex I (Developing country) | Asia |  |
| Australia | Both Annex I&II (Developed Country) (Developed Country) | Oceana |  |
| Austria | Both Annex I&II (Developed Country) | Europe | Excluded from final analysis |
| Azerbaijan | Non-Annex I (Developing country) | Asia |  |
| Bahamas | Non-Annex I (Developing country) | North America |  |
| Bahrain | Non-Annex I (Developing country) | Asia |  |
| Bangladesh | Non-Annex I (Developing country), ldc | Asia |  |
| Barbados | Non-Annex I (Developing country) | North America |  |
| Belarus | Annex I only (Developed Country) (Developed Country) | Europe |  |
| Belgium | Both Annex I&II (Developed Country) | Europe | Excluded from final analysis |
| Belize | Non-Annex I (Developing country) | North America |  |
| Benin | Non-Annex I (Developing country), LDC | Africa |  |
| Bhutan | Non-Annex I (Developing country), LDC | Asia |  |
| Bolivia (Plurinational State of) | Non-Annex I (Developing country) | South America | Excluded from final analysis |
| Bosnia and Herzegovina | Non-Annex I (Developing country) | Europe | Excluded from final analysis |
| Botswana | Non-Annex I (Developing country) | Africa |  |
| Brazil | Non-Annex I (Developing country) | South America |  |
| Brunei Darussalam | Non-Annex I (Developing country) | Asia | Excluded from final analysis |
| Bulgaria | Annex I only (Developed Country) | Europe | Excluded from final analysis |
| Burkina Faso | Non-Annex I (Developing country), LDC | Africa |  |
| Burundi | Non-Annex I (Developing country), LDC | Africa |  |
| Cabo Verde | Non-Annex I (Developing country) | Africa | Excluded from final analysis |
| Cambodia | Non-Annex I (Developing country), LDC | Asia |  |
| Cameroon | Non-Annex I (Developing country) | Africa |  |
| Canada | Both Annex I&II (Developed Country) | North America |  |
| Central African Republic | Non-Annex I (Developing country), LDC | Africa |  |
| Chad | Non-Annex I (Developing country), LDC | Africa |  |
| Chile | Non-Annex I (Developing country) | South America |  |
| China | Non-Annex I (Developing country) | Asia |  |
| Colombia | Non-Annex I (Developing country) | South America |  |
| Comoros | Non-Annex I (Developing country) | Africa |  |
| Congo | Non-Annex I (Developing country) | Africa |  |
| Cook Islands | Non-Annex I (Developing country) | Oceana |  |
| Costa Rica | Non-Annex I (Developing country) | North America |  |
| CÌ«te d'Ivoire | Non-Annex I (Developing country) | Africa | Excluded from final analysis |
| Croatia | Annex I only (Developed Country) | Europe | Excluded from final analysis |
| Cuba | Non-Annex I (Developing country) | North America |  |
| Cyprus | Annex I only (Developed Country) | Europe | Excluded from final analysis |
| Czechia | Annex I only (Developed Country) | Europe | Excluded from final analysis |
| Democratic People's Republic of Korea | Non-Annex I (Developing country) | Asia | Excluded from final analysis |
| Democratic Republic of the Congo | Non-Annex I (Developing country), LDC | Africa | Excluded from final analysis |
| Denmark | Both Annex I&II (Developed Country) | Europe | Excluded from final analysis |
| Djibouti | Non-Annex I (Developing country) | Africa |  |
| Dominica | Non-Annex I (Developing country) | North America |  |
| Dominican Republic | Non-Annex I (Developing country) | North America |  |
| Ecuador | Non-Annex I (Developing country) | South America |  |
| Egypt | Non-Annex I (Developing country) | Africa |  |
| El Salvador | Non-Annex I (Developing country) | North America |  |
| Equatorial Guinea | Non-Annex I (Developing country) | Africa |  |
| Eritrea | Non-Annex I (Developing country), LDC | Africa |  |
| Estonia | Annex I only (Developed Country) | Europe | Excluded from final analysis |
| Ethiopia | Non-Annex I (Developing country), LDC | Africa |  |
| Fiji | Non-Annex I (Developing country) | Oceana |  |
| Finland | Both Annex I&II (Developed Country) | Europe | Excluded from final analysis |
| France | Both Annex I&II (Developed Country) | Europe | Excluded from final analysis |
| Gabon | Non-Annex I (Developing country) | Africa |  |
| Gambia | Non-Annex I (Developing country), LDC | Africa |  |
| Georgia | Non-Annex I (Developing country) | Asia |  |
| Germany | Both Annex I&II (Developed Country) | Europe | Excluded from final analysis |
| Ghana | Non-Annex I (Developing country) | Africa |  |
| Greece | Both Annex I&II (Developed Country) | Europe | Excluded from final analysis |
| Grenada | Non-Annex I (Developing country) | North America |  |
| Guinea | Non-Annex I (Developing country), LDC | Africa |  |
| Guinea-Bissau | Non-Annex I (Developing country), LDC | Africa |  |
| Guyana | Non-Annex I (Developing country) | South America |  |
| Haiti | Non-Annex I (Developing country), LDC | North America |  |
| Honduras | Non-Annex I (Developing country) | North America |  |
| Hungary | Annex I only (Developed Country) | Europe | Excluded from final analysis |
| Iceland | Both Annex I&II (Developed Country) | Europe | Excluded from final analysis |
| India | Non-Annex I (Developing country) | Asia |  |
| Indonesia | Non-Annex I (Developing country) | Asia |  |
| Iran (Islamic Republic of) | Non-Annex I (Developing country) | Asia | Excluded from final analysis |
| Ireland | Both Annex I&II (Developed Country) | Europe | Excluded from final analysis |
| Israel | Non-Annex I (Developing country) | Asia |  |
| Italy | Both Annex I&II (Developed Country) | Europe | Excluded from final analysis |
| Jamaica | Non-Annex I (Developing country) | North America |  |
| Japan | Both Annex I&II (Developed Country) | Asia |  |
| Jordan | Non-Annex I (Developing country) | Asia |  |
| Kazakhstan | Non-Annex I (Developing country) | Asia | Excluded from final analysis |
| Kenya | Non-Annex I (Developing country) | Africa |  |
| Kiribati | Non-Annex I (Developing country). LDC | Oceana |  |
| Kuwait | Non-Annex I (Developing country) | Asia |  |
| Kyrgyzstan | Non-Annex I (Developing country) | Asia |  |
| Lao People's Democratic Republic | Non-Annex I (Developing country), LDC | Asia | Excluded from final analysis |
| Latvia | Annex I only (Developed Country) | Europe | Excluded from final analysis |
| Lebanon | Non-Annex I (Developing country) | Asia |  |
| Lesotho | Non-Annex I (Developing country), LDC | Africa |  |
| Liberia | Non-Annex I (Developing country), LDC | Africa |  |
| Liechtenstein | Annex I only (Developed Country) | Europe | Excluded from final analysis |
| Lithuania | Annex I only (Developed Country) | Europe | Excluded from final analysis |
| Luxembourg | Both Annex I&II (Developed Country) | Europe | Excluded from final analysis |
| Madagascar | Non-Annex I (Developing country), NDC | Africa |  |
| Malawi | Non-Annex I (Developing country), LDC | Africa |  |
| Malaysia | Non-Annex I (Developing country) | Asia |  |
| Maldives | Non-Annex I (Developing country) | Asia |  |
| Mali | Non-Annex I (Developing country), LDC | Africa |  |
| Malta | Annex I only (Developed Country) | Europe | Excluded from final analysis |
| Marshall Islands | Non-Annex I (Developing country) | Oceana |  |
| Mauritania | Non-Annex I (Developing country), LDC | Africa |  |
| Mauritius | Non-Annex I (Developing country) | Africa |  |
| Mexico | Non-Annex I (Developing country) | North America |  |
| Micronesia (Federated States of) | Non-Annex I (Developing country) | Oceana | Excluded from final analysis |
| Monaco | Annex I only (Developed Country) | Europe | Excluded from final analysis |
| Mongolia | Non-Annex I (Developing country) | Asia |  |
| Montenegro | Non-Annex I (Developing country) | Europe | Excluded from final analysis |
| Morocco | Non-Annex I (Developing country) | Africa |  |
| Mozambique | Non-Annex I (Developing country), LDC | Africa |  |
| Myanmar | Non-Annex I (Developing country), LDC | Asia |  |
| Namibia | Non-Annex I (Developing country) | Africa |  |
| Nauru | Non-Annex I (Developing country) | Oceana |  |
| Nepal | Non-Annex I (Developing country), LDC | Asia |  |
| Netherlands | Both Annex I&II (Developed Country) | Europe | Excluded from final analysis |
| New Zealand | Both Annex I&II (Developed Country) | Oceana | Excluded from final analysis |
| Niger | Non-Annex I (Developing country), NDC | Africa |  |
| Nigeria | Non-Annex I (Developing country) | Africa |  |
| Niue | Non-Annex I (Developing country) | Oceana |  |
| Norway | Both Annex I&II (Developed Country) | Europe | Excluded from final analysis |
| Oman | Non-Annex I (Developing country) | Asia | Excluded from final analysis |
| Pakistan | Non-Annex I (Developing country) | Asia |  |
| Palau | Non-Annex I (Developing country) | Oceana |  |
| Panama | Non-Annex I (Developing country) | North America |  |
| Papua New Guinea | Non-Annex I (Developing country) | Oceana |  |
| Paraguay | Non-Annex I (Developing country) | South America | Excluded from final analysis |
| Peru | Non-Annex I (Developing country) | South America |  |
| Philippines | Non-Annex I (Developing country) | Asia |  |
| Poland | Annex I only (Developed Country) | Europe | Excluded from final analysis |
| Portugal | Both Annex I&II (Developed Country) | Europe | Excluded from final analysis |
| Qatar | Non-Annex I (Developing country) | Asia |  |
| Republic of Korea | Annex I | Asia | Excluded from final analysis |
| Republic of Moldova | Non-Annex I (Developing country) | Europe | Excluded from final analysis |
| Romania | Annex I only (Developed Country) | Europe | Excluded from final analysis |
| Russian Federation | Annex I only (Developed Country) | Europe | Excluded from final analysis |
| Rwanda | Non-Annex I (Developing country), NDC | Africa |  |
| Saint Kitts and Nevis | Non-Annex I (Developing country) | North America | Excluded from final analysis |
| Saint Lucia | Non-Annex I (Developing country) | North America |  |
| Saint Vincent and the Grenadines | Non-Annex I (Developing country) | North America | Excluded from final analysis |
| Samoa | Non-Annex I (Developing country) | Oceana |  |
| San Marino | Non-Annex I (Developing country) | Europe | Excluded from final analysis |
| Sao Tome and Principe | Non-Annex I (Developing country) | Africa | Excluded from final analysis |
| Saudi Arabia | Non-Annex I (Developing country) | Asia |  |
| Senegal | Non-Annex I (Developing country), LDC | Africa |  |
| Serbia | Non-Annex I (Developing country) | Europe | Excluded from final analysis |
| Seychelles | Non-Annex I (Developing country) | Africa |  |
| Sierra Leone | Non-Annex I (Developing country), LDC | Africa |  |
| Singapore | Non-Annex I (Developing country) | Asia |  |
| Slovakia | Annex I only (Developed Country) | Europe | Excluded from final analysis |
| Slovenia | Annex I only (Developed Country) | Europe | Excluded from final analysis |
| Solomon Islands | Non-Annex I (Developing country) | Oceana |  |
| Somalia | Non-Annex I (Developing country) | Africa |  |
| South Africa | Non-Annex I (Developing country) | Africa |  |
| South Sudan | Non-Annex I (Developing country) | Africa | Excluded from final analysis |
| Spain | Both Annex I&II (Developed Country) | Europe | Excluded from final analysis |
| Sri Lanka | Non-Annex I (Developing country) | Asia |  |
| State of Palestine | Non-Annex I (Developing country) | Asia | Excluded from final analysis |
| Sudan | Non-Annex I (Developing country), LDC | Africa |  |
| Suriname | Non-Annex I (Developing country) | South America | Excluded from final analysis |
| Swaziland | Non-Annex I (Developing country) | Africa |  |
| Sweden | Both Annex I&II (Developed Country) | Europe | Excluded from final analysis |
| Switzerland | Both Annex I&II (Developed Country) | Europe | Excluded from final analysis |
| Tajikistan | Non-Annex I (Developing country) | Asia |  |
| Thailand | Non-Annex I (Developing country) | Asia |  |
| The former Yugoslav Republic of Macedonia | Non-Annex I (Developing country) | Europe | Excluded from final analysis |
| Timor-Leste | Non-Annex I (Developing country), DC | Oceana | Excluded from final analysis |
| Togo | Non-Annex I (Developing country), LDC | Africa |  |
| Tonga | Non-Annex I (Developing country) | Oceana |  |
| Trinidad and Tobago | Non-Annex I (Developing country) | North America | Excluded from final analysis |
| Tunisia | Non-Annex I (Developing country) | Africa | Excluded from final analysis |
| Turkey | Annex I only (Developed Country) | Asia |  |
| Turkmenistan | Non-Annex I (Developing country) | Asia | Excluded from final analysis |
| Tuvalu | Non-Annex I (Developing country), LDC | Oceana |  |
| Uganda | Non-Annex I (Developing country), LDC | Africa | Excluded from final analysis |
| Ukraine | Annex I only (Developed Country) | Europe | Excluded from final analysis |
| United Arab Emirates | Non-Annex I (Developing country) | Asia |  |
| United Kingdom of Great Britain and Northern Ireland | Both Annex I&II (Developed Country) | Europe | Excluded from final analysis |
| United Republic of Tanzania | Non-Annex I (Developing country), LDC | Africa | Excluded from final analysis |
| United States of America | Both Annex I&II (Developed Country) | North America | Excluded from final analysis |
| Uruguay | Non-Annex I (Developing country) | South America |  |
| Uzbekistan | Non-Annex I (Developing country) | Asia |  |
| Vanuatu | Non-Annex I (Developing country), LDC | Oceana | Excluded from final analysis |
| Venezuela (Bolivarian Republic of) | Non-Annex I (Developing country) | South America | Excluded from final analysis |
| Viet Nam | Non-Annex I (Developing country) | Asia | Excluded from final analysis |
| Yemen | Non-Annex I (Developing country), LDC | Asia |  |
| Zambia | Non-Annex I (Developing country), LDC | Africa |  |
| Zimbabwe | Non-Annex I (Developing country) | Africa |  |
